# Supplementary material for: Present perfect and preterit variation in the Spanish of Lima and Mexico city: findings from a corpus analysis
Source: publisher site journal article supplement (doi:10.1515/cllt-2022-0060), 2023-08-03
Supplement: Supplementary file 1 [file j_cllt-2022-0060_suppl_001.docx]

**Online appendices**

**Appendix A**: Participant demographic data for Lima (PRESEEA). *Note*: age = at the time of the interview.

| **Participant** | **Gender** | **Age** | **Age Group** | **Education** | **Education level** | **Profession** | **Origin** | **PP** | **Preterit** | **Total tokens** |
| --- | --- | --- | --- | --- | --- | --- | --- | --- | --- | --- |
| LIMA_H11_011-1 | Male | 26 | Younger | Elementary school | Basic | Waiter, laborer | Lima | 6 | 64 | 70 |
| LIMA_H12_028 | Male | 33 | High school | Medium | Actor | Lima | 9 | 61 | 70 |
| LIMA_H13_047 | Male | 28 | University | High | Historian | Lima | 13 | 57 | 70 |
| LIMA_M11_003 | Female | 26 | Elementary school | Basic | Housekeeper, seller | Lima | 29 | 36 | 65 |
| LIMA_M12_020 | Female | 30 | High school | Medium | Secretary | Lima | 3 | 67 | 70 |
| LIMA_M13_037 | Female | 27 | University | High | Dancer | Lima | 10 | 60 | 70 |
| LIMA_H21_014 | Male | 47 | Middle | Elementary school | Basic | Welder | Lima | 7 | 63 | 70 |
| LIMA_H22_033 | Male | 48 | High school | Medium | Police officer | Lima | 31 | 39 | 70 |
| LIMA_H23_050 | Male | 38 | University | High | Historian | Lima | 25 | 42 | 67 |
| LIMA_M21_005 | Female | 36 | Elementary school | Basic | Housekeeper | Lima | 15 | 49 | 64 |
| LIMA_M22_023 | Female | 45 | High school | Medium | Housekeeper | Lima | 5 | 65 | 70 |
| LIMA_M23_042 | Female | 40 | University | High | Psychologist | Lima | 10 | 52 | 62 |
| LIMA_H31_018 | Male | 81 | Older | Elementary school | Basic | Retired | Lima | 28 | 40 | 68 |
| LIMA_H32_036 | Male | 78 | High school | Medium | Shoemaker | Lima | 21 | 48 | 69 |
| LIMA_H33_053 | Male | 63 | University | High | Engineer | Lima | 13 | 56 | 69 |
| LIMA_M31_009 | Female | 55 | Elementary school | Basic | Housekeeper | Lima | 29 | 40 | 69 |
| LIMA_M32_025 | Female | 70 | High school | Medium | Housekeeper | Lima | 30 | 37 | 67 |
| LIMA_M33_043-1 | Female | 64 | University | High | Social worker | Lima | 19 | 48 | 67 |

**Appendix B:** Participant demographic data for Mexico City (PRESEEA). *Note*: age = at the time of the interview.

| **Participant** | **Gender** | **Age** | **Age Group** | **Education** | **Education level** | **Profession** | **Origin** | **PP** | **Preterit** | **Total tokens** |
| --- | --- | --- | --- | --- | --- | --- | --- | --- | --- | --- |
| MEXI_H11_078 | Male | 27 | Younger | Elementary school | Basic | Waiter | Mexico City | 2 | 68 | 70 |
| MEXI_H12_042 | Male | 20 | High school | Medium | Student | Mexico City | 6 | 63 | 70 |
| MEXI_H13_006 | Male | 24 | University | High | Architect | Mexico City | 14 | 57 | 70 |
| MEXI_M11_084 | Female | 21 | Elementary school (not completed) | Basic | Cleaner | Mexico City | 13 | 54 | 67 |
| MEXI_M12_048 | Female | 27 | High school (not completed) | Medium | Dancer, model | Mexico City | 12 | 57 | 69 |
| MEXI_M13_012 | Female | 21 | Medical school | High | Student | Mexico City | 15 | 53 | 68 |
| MEXI_H21_090 | Male | 52 | Middle | Elementary school | Basic | Blacksmith | Mexico City | 10 | 41 | 51 |
| MEXI_H22_054 | Male | 40 | High school | Medium | Security guard, painter, musician | Mexico City | 6 | 64 | 70 |
| MEXI_H23_018 | Male | 45 | University | High | Biologist | Mexico City | 0 | 70 | 70 |
| MEXI_M21_096 | Female | 37 | Elementary school | Basic | Cleaner | Mexico City | 2 | 68 | 70 |
| MEXI_M22_060 | Female | 51 | High school | Medium | Post office director | Mexico City | 4 | 66 | 70 |
| MEXI_M23_024 | Female | 40 | University | High | Historian, dancer | Mexico City | 1 | 69 | 70 |
| MEXI_H31_102 | Male | 75 | Older | No education | Basic | Book promoter | Mexico City | 4 | 66 | 70 |
| MEXI_H32_066 | Male | 59 | High school | Medium | Retired | Tepechitlán, Zacatecas. In Mexico City since he was 7 years old. | 0 | 70 | 70 |
| MEXI_H33_030 | Male | 72 | University | High | Actor, musician | Puebla. In Mexico City before he was 7 years old. | 5 | 64 | 69 |
| MEXI_M31_108 | Female | 78 | No education | Basic | Housekeeper | El Campanario, Hidalgo | 3 | 67 | 70 |
| MEXI_M32_072 | Female | 56 | High school | Medium | Teacher, seller | Mexico City | 4 | 64 | 68 |
| MEXI_M33_036 | Female | 58 | University | High | Teacher, researcher | Estado de Jalisco | 10 | 58 | 68 |

**Appendix C:** Thematic modules for PRESEEA interviews**[[1]](#footnote-1)**

1. GREETINGS

- Introductions.
- Preferred treatment form (*tú* – informal ‘you’— or *usted* – formal ‘you’) in the interview and in everyday life.

1. WEATHER

- Preferences about weather and station of the year.
- Elicitation of memories about the weather in the past.
- Questions about climate change and what would happen if we have a dough.

1. PLACE OF RESIDENCE

- The interviewee’s house, its distribution and whether it has been renovated.
- The neighbors and the neighborhood where the interviewee lives.
- Elicitation of memories about the neighborhood where the interviewee grew up.
- Elicitation of memories about how the neighborhood changed over time, and predictions about how it may change in the future.
- Where the interviewee and other local people go for fun or relaxation.

1. FAMILY AND FRIENDS

- The interviewee’s family (whether he/she is married or has kids).
- Qualities of good friends.
- The interviewee’s social, professional and everyday life.

1. CUSTOMS

- Questions about where and how the interviewee spends holidays.
- Questions about typical local food and typical meals in celebrations.
- how Christmas celebration changed over time.

1. DANGER OF DEATH

- The interviewee is asked to recount an extreme situation in which they feared for their life, or a very stressful situation they passed through.

1. IMPORTANT ANECDOTES

- Important events in the life of the interviewee, and how they faced them.

1. DESIRE OF ECONOMIC IMPROVEMENT

- Questions about gambling and lotteries.
- What one would do if winning much money.

1. CONCLUSION

- Where to buy a soda nearby the interview location.
- Farewells.

1. The full list of questions (in Spanish), along with recommendations for conducting the semi-structures interviews, are available at: <https://preseea.linguas.net/Portals/0/Metodolog%C3%ADa%20del%20Proyecto%20para%20el%20estudio%20socioling%C3%BC%C3%ADstico%20del%20espa%C3%B1ol%20de%20Espa%C3%B1a%20y%20de%20Am%C3%A9rica%20(PRESEEA)_Moreno%20Fern%C3%A1ndez%20(2021).pdf> [↑](#footnote-ref-1)
